## ESERINE AND NEOSTIGMINE ANTAGONISM TO D-TUBOCURARINE

J. C. BURKE, PH.D. AND C. R. LINEGAR, PH.D.\*

*New Brunswick, New Jersey*

AND

MURIEL N. FRANK, M.D. AND A. R. MCINTYRE, M.D.†

*Omaha, Nebraska*

Received for publication July 2, 1947

THE use of curare as an adjuvant in anesthesia increases interest in curare antidotes. Recently, McIntyre, Tullar and Frank (1) reported that a mixture of eserine, ephedrine and atropine was superior to neostigmine in counteracting the action of d-tubocurarine in dogs. Subsequently Burke and Linegar at the Squibb Laboratories were unable to confirm these observations, and it was decided that this question be jointly re-examined and an explanation sought for the difference in experimental findings. It was discovered in the course of these experiments that the cause of the discrepancy lay in the sample of neostigmine previously used by McIntyre et al. It was determined that this sample supplied by another manufacturer as pure prostigmin bromide was, in fact, a different compound under investigation by them; i.e., a primary amine containing a nitrogenous ring and subsequently shown to produce hypotensive responses in small doses.

This paper presents data obtained from experiments performed for the most part in duplicate by the two laboratories on the relative value of neostigmine methyl sulfate and either eserine salicylate alone or eserine with atropine sulfate and ephedrine sulfate as antidotes to d-tubocurarine chloride.

### PROCEDURE

The experiments fall into two categories, acute experiments on anesthetized dogs and experiments on intact unanesthetized animals. In the former, animals were anesthetized with either morphine and sodium barbital in the technic of Wiggers (2) or by cyclopropane-oxygen administered by a closed system. No measurable differences in results were observed which could be attributed to the anesthetic.

\* From the Product Development Division, E. R. Squibb and Sons, New Brunswick, N. J.

† From the Department of Physiology and Pharmacology, University of Nebraska Medical College, Omaha, Nebraska.

The anesthetized animals were arranged for the kymographic recording of muscle contractions when the muscles were driven by either monophasic spike shocks applied to the severed sciatic at five second intervals or by short bursts of tetanic stimuli usually applied at ten second intervals. Blood pressure and respiration were also recorded in many of the experiments.

A

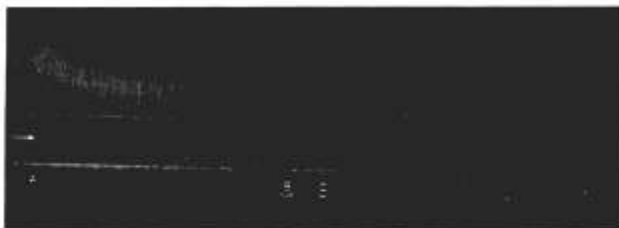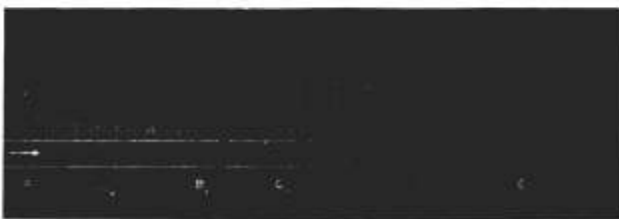

B

FIG. 1A. Monophasic spike shocks to cut sciatic nerve at five second intervals.

- A. d-tubocurarine chloride 0.18 mg./kg. intravenously.
- B. d-tubocurarine chloride 0.18 mg./kg. intravenously.
- C. 2 cc. of 0.1% solution of eserine salicylate intravenously.
- D. Same as A.
- E. Same as A.

FIG. 1B. Monophasic spike shocks to cut sciatic at five second intervals.

- A. d-tubocurarine chloride 0.18 mg./kg. intravenously.
- B. d-tubocurarine chloride 0.18 mg./kg. intravenously.
- C. 2 cc. of 0.05% solution of Neostigmine methyl sulfate intravenously.
- D. Same as A.
- E. Same as A.

In the experiments on unanesthetized animals, the head-drop dose of d-tubocurarine chloride was determined by several trials on each of the experimental animals and the duration of head-drop noted. In some experiments the dosage of curare was increased to 120, 140, 160 or 300 per cent of the head-drop dose. Injections were repeated with

neostigmine, eserine with atropine, or eserine with atropine and ephedrine administered immediately after the curare as antidotes and the duration of curarization compared with that obtained without antidotes.

### EXPERIMENTAL RESULTS

Figure 1 depicts the records obtained in two typical experiments upon anesthetized dogs in which the muscles were driven by single

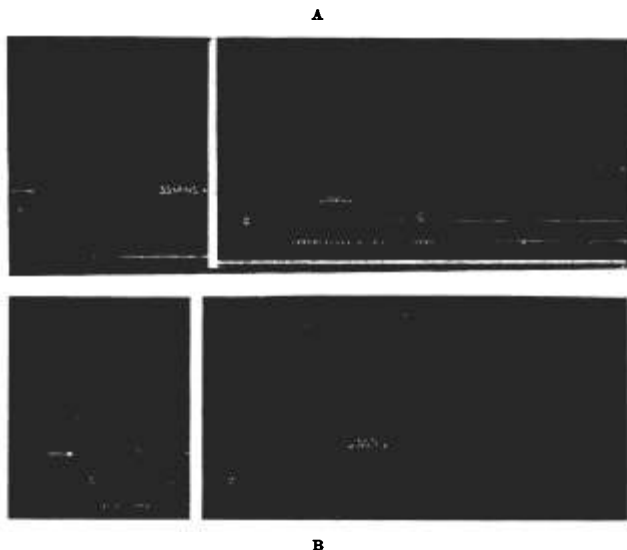

FIG. 2A. Monophasic tetanizing shocks applied to cut sciatic.

- A. d-tubocurarine solution injected slowly until tetanic contraction of muscle was not sustained. Tetanic response returned after approximately 35 minutes.
- B. d-tubocurarine solution injected as in A.
- C. Eserine salicylate 0.125 mg./kg. intravenously.

FIG. 2B. Monophasic tetanizing shocks applied to cut sciatic.

- A. d-tubocurarine solution injected slowly until tetanic contraction of muscle was not sustained. Tetanic response returned after approximately 15 minutes.
- B. d-tubocurarine solution injected as in A.
- C. Neostigmine methyl sulfate 0.125 mg./kg. intravenously.

spike shocks applied to the cut sciatic and the effects of d-tubocurarine alone and as modified by eserine or by neostigmine were compared. Figure 2 contains the records obtained from two experiments of the series in which bursts of tetanic stimulation were applied at regular

TABLE 1  
COMPARATIVE RECOVERY TIME OF DOGS FOLLOWING VARIOUS DOSES OF D-TUBOCURARINE CHLORIDE WITH AND WITHOUT NEOSTIGMINE OR ESERINE

| Wt. in kg. | Initial standardization |               |                               | Curare dose: 120% of H.D.<br>2 u./cc. (0.5 cc./10 sec.)                   |                                |                                                     | Curare dose: 140% of H.D.<br>2 u./cc. (0.5 cc./10 sec.) |                                                     |                                | Curare dose: 160% of H.D. <sup>1</sup><br>2 u./cc. (0.5 cc./10 sec.)      |                                                     |                                |
|------------|-------------------------|---------------|-------------------------------|---------------------------------------------------------------------------|--------------------------------|-----------------------------------------------------|---------------------------------------------------------|-----------------------------------------------------|--------------------------------|---------------------------------------------------------------------------|-----------------------------------------------------|--------------------------------|
|            | Average H.D. dose       |               | Average recovery time in min. | Recovery time with eserine (0.125 mg./u. and atropine (0.1 mg./u. curare) | Recovery time with no antidote | Recovery time with neostigmine (0.05 mg./u. curare) | Recovery time with no antidote                          | Recovery time with neostigmine (0.05 mg./u. curare) | Recovery time with no antidote | Recovery time with eserine (0.125 mg./u. and atropine (0.1 mg./u. curare) | Recovery time with neostigmine (0.05 mg./u. curare) | Recovery time with no antidote |
|            | Total units             | Units per kg. |                               |                                                                           |                                |                                                     |                                                         |                                                     |                                |                                                                           |                                                     |                                |
| kg.        | units                   | u./kg.        | min.                          | min.                                                                      | min.                           | min.                                                | min.                                                    | min.                                                | min.                           | min.                                                                      | min.                                                | min.                           |
| 10.0       | 8.8                     | 0.88          | 10.83                         | 20.17                                                                     | 1.00                           | 20.33                                               | 3.75                                                    | 1.35                                                | 43.17                          | 7.25                                                                      | 2.08                                                | 2.25                           |
| 14.6       | 12.2                    | 0.83          | 5.02                          | 9.72                                                                      | 2.33                           | 9.25                                                | 2.83                                                    | 3.58                                                | 20.00                          | 4.25                                                                      | 2.25                                                | 2.25                           |
| 16.0       | 17.2                    | 1.02          | 4.46                          | 5.50                                                                      | 0.67                           | 12.58                                               | 2.00                                                    | 0.75                                                | 20.00                          | 4.33                                                                      | 2.00                                                | 2.00                           |
| 16.3       | 15.8                    | 0.97          | 4.86                          | 7.67                                                                      | 0.63                           | 11.75                                               | 2.17                                                    | 1.25                                                | 20.72                          | 7.25                                                                      | 2.33                                                | 2.33                           |
| 22.2       | 12.8                    | 0.58          | 7.17                          | 3.67                                                                      | 2.00                           | 18.08                                               | 4.67                                                    | 0.92                                                | 18.74                          | 3.75                                                                      | 2.50                                                | 2.50                           |
| 14.6       | 16.0                    | 1.00          | 5.12                          | 7.25                                                                      | 2.55                           | 22.25                                               | 3.33                                                    | 1.12                                                | 44.13                          | 3.68                                                                      | 1.50                                                | 1.50                           |
| 13.1*      | 12.2                    | 0.88          | 4.33                          | 8.75                                                                      | 1.02                           | 25.00                                               | 4.33                                                    | 2.88                                                |                                |                                                                           |                                                     |                                |
| 26.8       | 34.0                    | 1.27          | 7.78                          | 17.00                                                                     | 3.50                           |                                                     |                                                         |                                                     |                                |                                                                           |                                                     |                                |
| †15.0      | 17.0                    | 1.13          | 10.75                         |                                                                           | 0.25                           |                                                     |                                                         |                                                     |                                |                                                                           |                                                     |                                |
| Average    |                         | 0.961 u./kg.  | 6.80                          | 10.22                                                                     | 2.41                           | 17.03                                               | 3.30                                                    | 1.69                                                | 30.79                          | 5.07                                                                      | 2.11                                                | ±6.73%                         |
|            |                         |               | S.E.:                         | ±18.75%                                                                   | ±10.05%                        | ±10.38%                                             | ±14.38%                                                 | ±11.77%                                             | ±14.40%                        | ±13.81%                                                                   |                                                     |                                |

\* Died within 24 hours after receiving curare 140 per cent of H.D. and no antidote.

† Received curare 140 per cent of H.D. and no antidote—resp. par. in 8 min.—1 cc. neostigmine (I.V.), 8.8 min. 1 cc. neostigmine (I.V.), dead 12.5 min.

‡ Received curare 120 per cent of H.D. and neostigmine—died within ½ hour after apparent recovery.

§ 1 unit = 0.154 mg. d-tubocurarine chloride pentahydrate.

intervals to the cut sciatic. The slow intravenous injection of a solution of d-tubocurarine causes a rapid loss of tetanic contraction. It will be observed in figure 1 that neostigmine caused a more abrupt recovery than eserine. In figure 2 it will be seen that neostigmine caused a greater degree of recovery of tetanic contractions than did eserine.

TABLE 2  
AVERAGE DURATION OF CURARE HEAD-DROP IN DOGS WITH AND WITHOUT ANTIDOTE

| Dog No. | d-tubocurarine<br>0.18 mg./kg. | d-tubocurarine 0.18 mg./kg.<br>with eserine, atropine, ephedrine |
|---------|--------------------------------|------------------------------------------------------------------|
|         | min.                           | min.                                                             |
| 1       | 9.83                           | 7.34                                                             |
| 2       | 12.16                          | 5.91                                                             |
| 3       | 4.33                           | 4.25                                                             |
| 4       | 7.16                           | 5.41                                                             |
| 5       | 5.75                           | 3.83                                                             |
| 6       | 7.66                           | 5.54                                                             |

\* 1 mg. d-tubocurarine chloride pentahydrate = 6.5 units.

TABLE 3  
DURATION OF RESPIRATORY PARALYSIS, HEAD-DROP AND ATAXIA IN DOGS GIVEN THREE HEAD-DROP DOSES OF D-TUBOCURARINE CHLORIDE WITH AND WITHOUT NEOSTIGMINE

| Dog No.                   | Wt. in kg. | Cur-are H.D. dose, units* | Total dose of curare administered, units | d-Tubocurarine chloride only             |           |        | d-Tubocurarine chloride (3 head-drop doses) + neostigmine (0.0167 mg./u. of curare) immediately following curare injection |           |        | d-Tubocurarine chloride (3 head-drop doses) + neostigmine (0.0167 mg./u. of curare) 15 minutes after curare injection |           |        |
|---------------------------|------------|---------------------------|------------------------------------------|------------------------------------------|-----------|--------|----------------------------------------------------------------------------------------------------------------------------|-----------|--------|-----------------------------------------------------------------------------------------------------------------------|-----------|--------|
|                           |            |                           |                                          | Respiratory paralysis                    | Head-drop | Ataxia | Respiratory paralysis                                                                                                      | Head-drop | Ataxia | Respiratory paralysis                                                                                                 | Head-drop | Ataxia |
|                           |            |                           |                                          | Time in minutes from respiratory failure |           |        | Time in minutes from neostigmine                                                                                           |           |        | Time in minutes from neostigmine                                                                                      |           |        |
|                           |            |                           |                                          |                                          |           |        |                                                                                                                            |           |        |                                                                                                                       |           |        |
| 2877                      | 9.5        | 6.0                       | 18.0                                     | 57.42                                    | 108.33    | 130.17 | 4.92                                                                                                                       | 51.17     | 76.00  | 20.75                                                                                                                 | 39.75     | 48.75  |
| 1714                      | 13.5       | 6.0                       | 18.0                                     | 53.00                                    | 53.00     | 78.00  | 1.00                                                                                                                       | 30.92     | 30.92  | 2.75                                                                                                                  | 26.92     | 30.25  |
| 2852                      | 10.9       | 5.5                       | 16.5                                     | 29.75                                    | 51.75     | 66.75  | 10.00                                                                                                                      | 43.50     | 43.50  | 1.67                                                                                                                  | 5.67      | 37.67  |
| 1712                      | 16.4       | 6.0                       | 18.0                                     | 25.58                                    | 46.58     | 48.00  | 14.00                                                                                                                      | 17.50     | 17.50  | 4.33                                                                                                                  | 21.50     | 26.08  |
| 2842                      | 10.2       | 5.5                       | 16.5                                     | 51.00                                    | 55.50     | 61.25  | 6.82                                                                                                                       | 20.08     | 20.08  | 1.75                                                                                                                  | 8.25      | 19.50  |
| Mean (log) ratio of       |            |                           |                                          |                                          |           |        |                                                                                                                            |           |        |                                                                                                                       |           |        |
| Duration with neostigmine |            |                           |                                          |                                          |           |        | .1289±                                                                                                                     | .5006±    | .4481± | .1436±                                                                                                                | .2691±    | .4273± |
| Dur. without neostigmine  |            |                           |                                          |                                          |           |        | 61.2%                                                                                                                      | 14.7%     | 14.2%  | 17.8%                                                                                                                 | 31.6%     | 10.3%  |

\* 1 unit = 0.154 mg. d-tubocurarine chloride pentahydrate.

Table 1 presents data obtained from a representative series of animals in which the relative effectiveness of eserine with atropine and neostigmine as antidotes to d-tubocurarine were compared at increasing dosage levels of curare. It will be seen that neostigmine proved superior to eserine. In another series of animals the effectiveness of

a mixture of ephedrine, atropine and eserine was determined. Although this mixture significantly shortened the duration of head-drop, it was less effective than neostigmine (table 2). A third group of dogs given 3 head-drop doses of d-tubocurarine required artificial respiration for various periods of time. Neostigmine 0.0167 mg. per unit (0.154 mg) of curare given either immediately or fifteen minutes after the curare significantly reduced the recovery time from curarization (table 3). Greater total dosage of neostigmine was not attempted for fear of blood pressure depression.

### DISCUSSION

In curare overdosage, the most effective treatment is prompt intratracheal intubation and the application of artificial respiration with oxygen.\* This is perhaps best accomplished by the rhythmic application of pressure to the anesthetic bag. In dogs it has been found that intubation should be performed routinely because very frequently in fully curarized animals the relaxed muscles may result in obstruction of the respiratory passages. Artificial respiration alone when performed as outlined above will usually afford sufficient support until spontaneous respiration occurs. The use of neostigmine will shorten the period for the necessity of artificial respiration, but its administration should be considered as an adjuvant to treatment rather than as a substitute.

Since 1900 when Pal (3) reported upon eserine-curare antagonism and the subsequent synthesis of neostigmine and other methylcarbamic esters, the use of these substances as curare antidotes has become well established. In 1922 Hori (4) attempted to place eserine-curare antagonism on a quantitative basis but concluded that the antagonism is limited. Large doses of eserine may result in a loss of indirect excitability. Koppányi and Vivino (5) found that eserine in doses of 0.1 mg./kg. in rabbits prevented death in animals that had received 1.5 units/kg. of d-tubocurarine. The same authors found that neostigmine was equally effective in about one-half the dose. These results agree with those reported above. It should be pointed out that the dosage of neostigmine found effective in experimental animals is considerably greater than that commonly recommended for clinical use in man. It appears likely that the recommended clinical dose of 1.0 cc. of 1:2,000 neostigmine methylsulfate is too low to be effective and it is suggested that for a 75 kg. patient from three to five times this amount be used.

### CONCLUSIONS

1. In d-tubocurarine overdosage the intravenous injection of neostigmine in dogs promptly restores indirect excitability of muscle and restores the ability of the muscle to maintain tetanic contractions.

2. Neostigmine is superior to eserine and eserine-atropine-ephedrine mixtures as an antidote to d-tubocurarine.

3. The dosage of neostigmine heretofore used clinically in curare overdosage is probably inadequate.

\* O<sub>2</sub>CO<sub>2</sub> mixtures should not be used.

#### REFERENCES

1. McIntyre, A. R.; Tullar, P., and Frank, M.: Failure of Neostigmine as an Antidote for Curare, *Proc. Central Soc. Clin. Research* 19: 68, 1946.
2. Wiggers, Carl J.: The Present Status of the Shock Problem, *Physiol. Rev.* 22: 74-123 (Jan.) 1942.
3. Pal, J.: Physostigmin ein Gegengift des Curare, *Centralbl. f. Physiol* 14: 255-258, 1900.
4. Hori, S.: Influence of Physical and Pharmacological Effects on the Action of Curare, *Folia Pharmacol. Japon* 4: 269-280, 1927.
5. Koppányi, T., and Vivino, A. E.: Prevention and Treatment of d-Tubocurarine Poisoning, *Science* 100: 474-475 (Nov.) 1944.

(Continued from page 238)

Positions offered will be in the following hospitals:

| <i>Name</i>            | <i>Location</i>      | <i>Bed Capacity</i> |
|------------------------|----------------------|---------------------|
| 97th General Hospital  | Frankfurt, Germany   | 1000                |
| 98th General Hospital  | Munich, Germany      | 1000                |
| 110th Station Hospital | Vienna, Austria      | 150                 |
| 120th Station Hospital | Beyreuth, Germany    | 325                 |
| 124th Station Hospital | Linz, Austria        | 150                 |
| 130th Station Hospital | Heidelberg, Germany  | 250                 |
| 250th Station Hospital | Regensburg, Germany  | 150                 |
| 279th Station Hospital | Berlin, Germany      | 350                 |
| 317th Station Hospital | Wersbaden, Germany   | 150                 |
| 319th Station Hospital | Bremerhaven, Germany | 600                 |
| 385th Station Hospital | Nurnberg, Germany    | 350                 |
| 387th Station Hospital | Stuttgart, Germany   | 453                 |
| 388th Station Hospital | Giessen, Germany     | 250                 |

These locations provide excellent facilities and equipment, a wealth of clinical material and the services of visiting consultants who are outstanding specialists in the various fields of medical practice. In addition, opportunities will be afforded to observe the work of notable scientists and physicians in German and Austrian Universities.

2. The applicant may avail himself of this training for periods of one, two or three years. Those applicants who are selected, and who hold reserve commissions in the Medical Corps, will usually be recalled to active duty in the highest grade attained prior to release from previous active service. Those who do not hold such reserve commissions will be tendered a reserve commission in the Medical Corps in keeping with their age, years of professional experience and prior service in any branch of the Armed Forces. Prior military service is not required. Individuals who are mem-

(Continued on page 295)
